# Supplementary material for: The Hotspots and Trends of Patented Technologies for Heavy Metal-Contaminated Soil Remediation: A Systematic Review
Source: MDPI journal article supplement (doi:10.3390/agriculture14050715), 2024-04-30
Supplement: s1 [file s1]

Archive with 3 entries (3 files):
- S1-IPC Classification.pdf
- S2-DWPI Classification Code.pdf
- S3-DWPI Manual coded.pdf
