# Supplementary material for: The Hotspots and Trends of Patented Technologies for Heavy Metal-Contaminated Soil Remediation: A Systematic Review
Source: MDPI journal article supplement (doi:10.3390/agriculture14050715), 2024-04-30
Supplement: s1 [file s1]

**Table S3 Category description of DWPI Manual Code**

| <b>Section</b> | <b>Class</b> | <b>Explanation</b>                                                      |
|----------------|--------------|-------------------------------------------------------------------------|
| A              | 02           | Polymerisation Controllers                                              |
| A              | 03           | Natural Polymers                                                        |
| A              | 04           | Addition Polymers                                                       |
| A              | 05           | Condensation Polymers                                                   |
| A              | 06           | Inorganic Polymers                                                      |
| A              | 07           | Polymer Blends, Aqueous Dispersions                                     |
| A              | 08           | Additives                                                               |
| A              | 09           | Properties, analysis, testing, control                                  |
| A              | 10           | Polymerisation, polymer modification                                    |
| A              | 11           | Processing polymers including equipment                                 |
| A              | 12           | Polymer applications                                                    |
| B              | 04           | Natural products (or genetically engineered), polymers                  |
| B              | 05           | Miscellaneous                                                           |
| B              | 06           | Heterocyclics, Fused Ring                                               |
| B              | 10           | Aromatics and cycloaliphatics (mono and bicyclic only), aliphatics      |
| B              | 11           | Processes, Apparatus                                                    |
| B              | 12           | Diagnostics and formulation types (therapeutic, pesticidal, herbicidal) |
| B              | 14           | Pharmaceutical Activities                                               |
| C              | 02           | Antibiotics                                                             |
| C              | 04           | Natural products (or genetically engineered), polymers                  |
| C              | 05           | Miscellaneous                                                           |
| C              | 06           | Heterocyclics, Fused Ring                                               |
| C              | 07           | Heterocyclics, Mononuclear                                              |
| C              | 08           | Aromatics, Polycarbocyclic                                              |
| C              | 09           | Alicyclics, Polycarbocyclic                                             |
| C              | 10           | Aromatics and cycloaliphatics (mono and bicyclic only), aliphatics      |
| C              | 11           | Processes, Apparatus                                                    |
| C              | 12           | Diagnostics and formulation types (therapeutic, pesticidal, herbicidal) |
| C              | 14           | Agricultural Activities                                                 |
| C              | 15           | Vitamins                                                                |
| D              | 03           | Foodstuffs and Treatment                                                |

---

|   |    |                                                                    |
|---|----|--------------------------------------------------------------------|
| D | 04 | Treating water, waste water and sewage                             |
| D | 05 | Fermentation Industry                                              |
| D | 07 | Skins, hides, pelts, leather, tobacco                              |
| D | 08 | Cosmetics, dental, toilet preparations                             |
| D | 09 | Sterilising and disinfecting, bandages and dressings               |
| D | 10 | Animal and Vegetable Oils                                          |
| D | 11 | Detergents, Soap, Glycerol                                         |
| E | 04 | Other Natural Materials                                            |
| E | 05 | Miscellaneous Organic                                              |
| E | 06 | Heterocyclic Fused Rings                                           |
| E | 07 | Heterocyclic, Mononuclear                                          |
| E | 08 | Aromatic, Polycarbocyclic                                          |
| E | 10 | Aromatic and cyclo aliphatic (mono and bicyclic only), aliphatic   |
| E | 11 | Processes, Apparatus                                               |
| E | 12 | Physical Form                                                      |
| E | 25 | General and Other Dyes                                             |
| E | 32 | Ammonia, cyanogen and compounds [general]                          |
| E | 33 | Alkali Metal Compounds                                             |
| E | 34 | Compounds of be, Mg, Al, Ca, Sr, Ba, Ra, Th, rare earths [general] |
| E | 35 | Compounds of Other Metals                                          |
| F | 01 | Natural/Synthetic Threads/Fibres                                   |
| F | 02 | Fabrics and their Production                                       |
| F | 03 | Treatment of Fabric Products                                       |
| F | 04 | Textile Applications                                               |
| F | 05 | Paper and Wood                                                     |
| G | 02 | Coatings, paints, inks, natural resins, polishes                   |
| G | 03 | Adhesives                                                          |
| G | 04 | Miscellaneous compositions and applications                        |
| G | 06 | Photographic materials and processes                               |
| H | 01 | Crude Oil and Natural Gas                                          |
| H | 03 | Transportation and Storage                                         |
| H | 04 | Petroleum Processing                                               |
| H | 06 | Gaseous and Liquid Fuels                                           |
| H | 07 | Lubricants and Lubrication                                         |

---

---

|   |    |                                                                                                  |
|---|----|--------------------------------------------------------------------------------------------------|
| H | 09 | Fuels not of Petroleum Origin                                                                    |
| J | 01 | Separation                                                                                       |
| J | 02 | Mixing, Crushing, Spraying                                                                       |
| J | 03 | Electrochemical processes, electrophoresis                                                       |
| J | 04 | Chemical/physical processes/apparatus                                                            |
| K | 07 | Health Physics                                                                                   |
| L | 02 | Refractories, Ceramics, Cement                                                                   |
| L | 03 | Electro-(in)organics                                                                             |
| M | 14 | Other chemical metal surface treatment                                                           |
| M | 22 | Casting, Powder Metallurgy                                                                       |
| M | 24 | Metallurgy of Iron and Steel                                                                     |
| M | 25 | Non-ferrous metal production/refining                                                            |
| M | 28 | Electrolytic/electrothermic production/refining metals                                           |
| N | 01 | Alkali(ne earth) metal, B, Al, Si - element, (hydr)oxide, inorganic salt, carboxylate catalyst   |
| N | 02 | Fe, Co, Ni, Cu, noble metal - element, (hydr)oxide, inorganic salt, carboxylate [general]        |
| N | 03 | Other metal - element, (hydr)oxide, inorganic salt, carboxylate catalyst [general]               |
| N | 04 | C, N, O, P, S, Se, Te, halogen - element, inorganic compound catalyst [general]                  |
| N | 05 | Metal hydride, coordination complex, organic compound catalyst (excluding carboxylate) [general] |
| N | 06 | Molecular sieve, zeolite, special form, general                                                  |
| N | 07 | Catalyst applications and uses                                                                   |
| P | 11 | SOIL WORKING; PLANTING                                                                           |
| P | 12 | HARVESTING                                                                                       |
| P | 13 | PLANT CULTURE; DAIRY PRODUCTS                                                                    |
| P | 32 | DENTISTRY, BANDAGES, VETERINARY, PROSTHESIS                                                      |
| P | 34 | STERILIZING, SYRINGES                                                                            |
| P | 35 | LIFE SAVING, SAFETY, FIREFIGHTING, FIRE EXTINGUISHING AND FIRE PREVENTION                        |
| P | 41 | CRUSHING, CENTRIFUGING, SEPARATING SOLIDS, SORTING                                               |
| P | 42 | SPRAYING, ATOMIZING, COATING, SURFACE TREATMENT AND LIQUID APPLICATION                           |
| P | 43 | GENERATING AND USING MECHANICAL VIBRATIONS, CLEANING, WASTE DISPOSAL                             |
| P | 53 | METAL CASTING AND POWDER METALLURGY                                                              |
| P | 62 | HAND TOOLS, CUTTING                                                                              |
| P | 71 | PRESSES                                                                                          |
| P | 73 | LAYERED PRODUCTS                                                                                 |

---

---

|   |    |                                                                           |
|---|----|---------------------------------------------------------------------------|
| P | 85 | EDUCATIONAL, CRYPTOGRAPHIC OR ADVERTISING APPARATUS OR SYSTEMS            |
| Q | 15 | TRANSPORTING SPECIAL LOADS                                                |
| Q | 17 | VEHICLE CONSTRUCTION, FITTINGS, PROPULSION ARRANGEMENTS                   |
| Q | 19 | VEHICLE APPLICATIONS                                                      |
| Q | 22 | HAND/FOOT/ANIMAL DRAWN VEHICLES                                           |
| Q | 32 | CONTAINER/CLOSURE TYPES, SPECIAL PACKAGING FEATURES AND TRANSIT PACKAGING |
| Q | 33 | PACKAGING CONTAINER AND CLOSURE MATERIALS                                 |
| Q | 34 | TYPES OF GOODS PACKAGED, BOTTLED, BOUND, LABELLED, UNPACKED               |
| Q | 35 | REFUSE COLLECTION; CONVEYORS                                              |
| Q | 42 | HYDRAULIC ENGINEERING, SOIL SHIFTING AND SEWERAGE                         |
| Q | 43 | GENERAL BUILDING CONSTRUCTIONS                                            |
| Q | 49 | MINING                                                                    |
| Q | 55 | POSITIVE DISPLACEMENT FLUID MACHINES/PUMPS/COMPRESSORS                    |
| Q | 57 | FLUID PRESSURE ACTUATORS; HYDRAULIC/PNEUMATICS IN GENERAL                 |
| Q | 63 | COUPLINGS; CLUTCHES; BRAKES; SPRINGS; DAMPERS                             |
| Q | 68 | OTHER ENGINEERING ELEMENTS                                                |
| Q | 73 | COMBUSTION APPARATUS AND PROCESSES                                        |
| Q | 74 | HEATING, RANGES AND VENTILATING                                           |
| Q | 76 | DRYING                                                                    |
| Q | 77 | FURNACES, KILNS, OVENS, RETORTS                                           |
| Q | 78 | HEAT EXCHANGE                                                             |
| S | 01 | ELECTRICAL INSTRUMENTS                                                    |
| S | 02 | ENGINEERING INSTRUMENTATION                                               |
| S | 03 | SCIENTIFIC INSTRUMENTATION                                                |
| S | 05 | ELECTRICAL MEDICAL EQUIPMENT                                              |
| T | 01 | DIGITAL COMPUTERS                                                         |
| T | 04 | COMPUTER PERIPHERAL EQUIPMENT                                             |
| T | 05 | COUNTING, CHECKING, VENDING, ATM AND POS SYSTEMS                          |
| T | 06 | PROCESS AND MACHINE CONTROL                                               |
| U | 11 | SEMICONDUCTOR MATERIALS AND PROCESSES                                     |
| U | 24 | AMPLIFIER AND LOW POWER SUPPLIES                                          |
| V | 01 | RESISTORS AND CAPACITORS                                                  |
| V | 03 | SWITCHES, RELAYS                                                          |

---

---

|   |    |                                                   |
|---|----|---------------------------------------------------|
| V | 04 | PRINTED CIRCUITS AND CONNECTORS                   |
| V | 05 | VALVES, DISCHARGE TUBES AND CRTS                  |
| V | 06 | ELECTROMECHANICAL TRANSDUCERS AND SMALL MACHINES  |
| V | 07 | FIBER-OPTICS AND LIGHT CONTROL                    |
| V | 08 | LASERS AND MASERS                                 |
| W | 01 | TELEPHONE AND DATA TRANSMISSION SYSTEMS           |
| W | 02 | BROADCASTING, RADIO AND LINE TRANSMISSION SYSTEMS |
| W | 04 | AUDIO/VISUAL RECORDING AND SYSTEMS                |
| W | 05 | ALARMS, SIGNALLING, TELEMETRY AND TELECONTROL     |
| W | 06 | AVIATION, MARINE AND RADAR SYSTEMS                |
| X | 11 | POWER GENERATION AND HIGH POWER MACHINES          |
| X | 12 | POWER DISTRIBUTION/COMPONENTS/CONVERTERS          |
| X | 15 | NON-FOSSIL FUEL POWER GENERATING SYSTEMS          |
| X | 16 | ELECTROCHEMICAL STORAGE                           |
| X | 22 | AUTOMOTIVE ELECTRICS                              |
| X | 25 | INDUSTRIAL ELECTRIC EQUIPMENT                     |

---

|   |    |                                |
|---|----|--------------------------------|
| X | 27 | DOMESTIC ELECTRICAL APPLIANCES |
|---|----|--------------------------------|

---
