# Supplementary material for: The Hotspots and Trends of Patented Technologies for Heavy Metal-Contaminated Soil Remediation: A Systematic Review
Source: MDPI journal article supplement (doi:10.3390/agriculture14050715), 2024-04-30
Supplement: s1 [file s1 › S1-IPC Classification.pdf]

**Table S1 Category description of IPC Classification**

| Section | Class | Explanation                                                                                                                                                                                                       |
|---------|-------|-------------------------------------------------------------------------------------------------------------------------------------------------------------------------------------------------------------------|
| A       | 01    | AGRICULTURE; FORESTRY; ANIMAL HUSBANDRY; HUNTING; TRAPPING; FISHING                                                                                                                                               |
| A       | 23    | FOODS OR FOODSTUFFS; TREATMENT THEREOF, NOT COVERED BY OTHER CLASSES                                                                                                                                              |
| A       | 61    | MEDICAL OR VETERINARY SCIENCE; HYGIENE                                                                                                                                                                            |
| A       | 62    | LIFE-SAVING; FIRE-FIGHTING                                                                                                                                                                                        |
| B       | 01    | PHYSICAL OR CHEMICAL PROCESSES OR APPARATUS IN GENERAL                                                                                                                                                            |
| B       | 02    | CRUSHING, PULVERISING, OR DISINTEGRATING; PREPARATORY TREATMENT OF GRAIN FOR MILLING                                                                                                                              |
| B       | 03    | SEPARATION OF SOLID MATERIALS USING LIQUIDS OR USING PNEUMATIC TABLES OR JIGS; MAGNETIC OR ELECTROSTATIC SEPARATION OF SOLID MATERIALS FROM SOLID MATERIALS OR FLUIDS; SEPARATION BY HIGH-VOLTAGE ELECTRIC FIELDS |
| B       | 04    | CENTRIFUGAL APPARATUS OR MACHINES FOR CARRYING-OUT PHYSICAL OR CHEMICAL PROCESSES                                                                                                                                 |
| B       | 05    | SPRAYING OR ATOMISING IN GENERAL; APPLYING FLUENT MATERIALS TO SURFACES, IN GENERAL                                                                                                                               |
| B       | 07    | SEPARATING SOLIDS FROM SOLIDS; SORTING                                                                                                                                                                            |
| B       | 08    | CLEANING                                                                                                                                                                                                          |
| B       | 09    | DISPOSAL OF SOLID WASTE; RECLAMATION OF CONTAMINATED SOIL                                                                                                                                                         |
| B       | 22    | CASTING; POWDER METALLURGY                                                                                                                                                                                        |
| B       | 26    | HAND CUTTING TOOLS; CUTTING; SEVERING                                                                                                                                                                             |
| B       | 29    | WORKING OF PLASTICS; WORKING OF SUBSTANCES IN A PLASTIC STATE IN GENERAL                                                                                                                                          |
| B       | 30    | PRESSES                                                                                                                                                                                                           |
| B       | 32    | LAYERED PRODUCTS                                                                                                                                                                                                  |
| B       | 60    | VEHICLES IN GENERAL                                                                                                                                                                                               |
| B       | 62    | LAND VEHICLES FOR TRAVELLING OTHERWISE THAN ON RAILS                                                                                                                                                              |
| B       | 65    | CONVEYING; PACKING; STORING; HANDLING THIN OR FILAMENTARY MATERIAL                                                                                                                                                |
| B       | 82    | NANOTECHNOLOGY                                                                                                                                                                                                    |
| C       | 01    | INORGANIC CHEMISTRY                                                                                                                                                                                               |
| C       | 02    | TREATMENT OF WATER, WASTE WATER, SEWAGE, OR SLUDGE                                                                                                                                                                |
| C       | 03    | GLASS; MINERAL OR SLAG WOOL                                                                                                                                                                                       |
| C       | 04    | CEMENTS; CONCRETE; ARTIFICIAL STONE; CERAMICS; REFRACTORIES                                                                                                                                                       |
| C       | 05    | FERTILISERS; MANUFACTURE THEREOF                                                                                                                                                                                  |
| C       | 07    | ORGANIC CHEMISTRY                                                                                                                                                                                                 |
| C       | 08    | ORGANIC MACROMOLECULAR COMPOUNDS; THEIR PREPARATION OR CHEMICAL WORKING-UP; COMPOSITIONS BASED THEREON                                                                                                            |
| C       | 09    | DYES; PAINTS; POLISHES; NATURAL RESINS; ADHESIVES; COMPOSITIONS NOT OTHERWISE PROVIDED FOR; APPLICATIONS OF MATERIALS NOT OTHERWISE PROVIDED FOR                                                                  |
| C       | 10    | PETROLEUM, GAS OR COKE INDUSTRIES; TECHNICAL GASES CONTAINING CARBON MONOXIDE; FUELS; LUBRICANTS; PEAT                                                                                                            |
| C       | 11    | ANIMAL OR VEGETABLE OILS, FATS, FATTY SUBSTANCES OR WAXES; FATTY ACIDS THEREFROM; DETERGENTS; CANDLES                                                                                                             |
| C       | 12    | BIOCHEMISTRY; BEER; SPIRITS; WINE; VINEGAR; MICROBIOLOGY; ENZYMOLOGY; MUTATION OR GENETIC ENGINEERING                                                                                                             |
| C       | 14    | SKINS; HIDES; PELTS OR LEATHER                                                                                                                                                                                    |
| C       | 22    | METALLURGY; FERROUS OR NON-FERROUS ALLOYS; TREATMENT OF                                                                                                                                                           |

|       |    |                                                                  |
|-------|----|------------------------------------------------------------------|
| <hr/> |    |                                                                  |
|       |    | ALLOYS OR NONFERROUS METALS                                      |
| C     | 25 | ELECTROLYTIC OR ELECTROPHORETIC PROCESSES; APPARATUS THEREFOR    |
| D     | 01 | NATURAL OR MAN-MADE THREADS OR FIBRES; SPINNING                  |
| D     | 04 | BRAIDING; LACE-MAKING; KNITTING; TRIMMINGS; NON-WOVEN FABRICS    |
|       |    | TREATMENT OF TEXTILES OR THE LIKE; LAUNDERING; FLEXIBLE          |
| D     | 06 | MATERIALS NOT OTHERWISE PROVIDED FOR                             |
| D     | 21 | PAPER-MAKING; PRODUCTION OF CELLULOSE                            |
| E     | 01 | CONSTRUCTION OF ROADS, RAILWAYS, OR BRIDGES                      |
| E     | 02 | HYDRAULIC ENGINEERING; FOUNDATIONS; SOIL-SHIFTING                |
| E     | 03 | WATER SUPPLY; SEWERAGE                                           |
| E     | 04 | BUILDING                                                         |
| E     | 21 | EARTH OR ROCK DRILLING; MINING                                   |
|       |    | COMBUSTION ENGINES; HOT-GAS OR COMBUSTION-PRODUCT ENGINE         |
| F     | 02 | PLANTS                                                           |
|       |    | POSITIVE-DISPLACEMENT MACHINES FOR LIQUIDS; PUMPS FOR LIQUIDS OR |
| F     | 04 | ELASTIC FLUIDS                                                   |
| F     | 15 | FLUID-PRESSURE ACTUATORS; HYDRAULICS OR PNEUMATICS IN GENERAL    |
|       |    | ENGINEERING ELEMENTS OR UNITS; GENERAL MEASURES FOR PRODUCING    |
|       |    | AND MAINTAINING EFFECTIVE FUNCTIONING OF MACHINES OR             |
| F     | 16 | INSTALLATIONS; THERMAL INSULATION IN GENERAL                     |
| F     | 22 | STEAM GENERATION                                                 |
| F     | 23 | COMBUSTION APPARATUS; COMBUSTION PROCESSES                       |
| F     | 24 | HEATING; RANGES; VENTILATING                                     |
| F     | 26 | DRYING                                                           |
| F     | 27 | FURNACES; KILNS, OVENS OR RETORTS                                |
| F     | 28 | HEAT EXCHANGE IN GENERAL                                         |
| G     | 01 | MEASURING; TESTING                                               |
| G     | 05 | CONTROLLING; REGULATING                                          |
| G     | 06 | COMPUTING; CALCULATING OR COUNTING                               |
| G     | 08 | SIGNALLING                                                       |
| G     | 09 | EDUCATING; CRYPTOGRAPHY; DISPLAY; ADVERTISING; SEALS             |
|       |    | INFORMATION AND COMMUNICATION TECHNOLOGY [ICT] SPECIALLY         |
| G     | 16 | ADAPTED FOR SPECIFIC APPLICATION FIELDS                          |
| G     | 21 | NUCLEAR PHYSICS; NUCLEAR ENGINEERING                             |
| H     | 01 | ELECTRIC ELEMENTS                                                |
| H     | 02 | GENERATION, CONVERSION, OR DISTRIBUTION OF ELECTRIC POWER        |
| H     | 03 | ELECTRONIC CIRCUITRY                                             |
| H     | 04 | ELECTRIC COMMUNICATION TECHNIQUE                                 |
| H     | 05 | ELECTRIC TECHNIQUES NOT OTHERWISE PROVIDED FOR                   |
| <hr/> |    |                                                                  |
